# Supplementary material
Source: PubMed Central journal article supplement (PMC2490817)

## Supplementary figure captions

**S 1.** Validation of PEGDA labeling. A) MALDI-TOF spectrum of unlabeled 8kDa PEGDA. B) MALDI-TOF spectrum of labeled 8kDa PEGDA. C) MALDI-TOF spectrum of labeled 8kDa PEGDA with peaks indicating presence of mono-labeled PEGDA.

**S2.** A) Representative images of live/dead staining of HUVEC cells encapsulated in PEG hydrogel arrays with varying degradability within spots and a non-degradable background, 7 days after hydrogel preparation (seeding density= $1.0 \times 10^6$  cells/ml, 40x magnification, scale bar = 100  $\mu$ m). B) Quantitative analysis of HUVEC viability in hydrogel array with varying degradability within spots and a non-degradable background. \* Significant difference within the same time points,  $p < 0.05$ , ANOVA.

**S3.** Representative images of live/dead staining of HL-1 cells encapsulated in PEG hydrogel arrays with varying degradability, 7 days after hydrogel preparation (seeding density= $1.0 \times 10^6$  cells/ml), demonstrating the influence of matrix degradation on viability.

**S4.** Effect of the amount of time cells remained in PEGDA suspension before and after photo-crosslinking on hMSC viability.

S1.

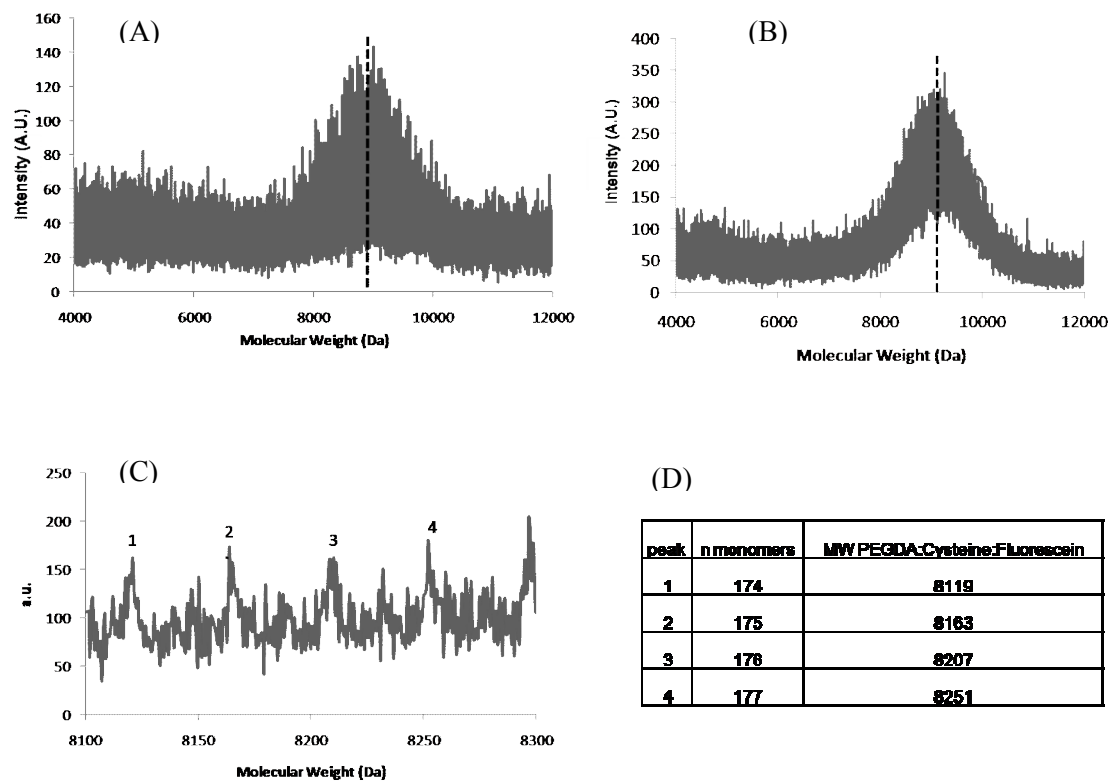

S2.

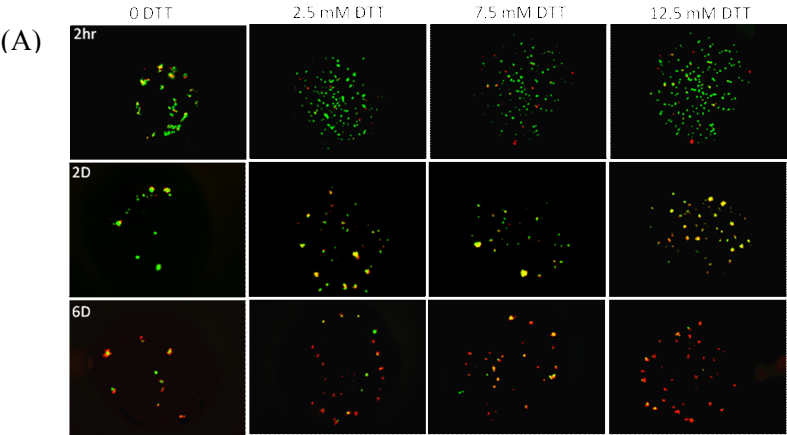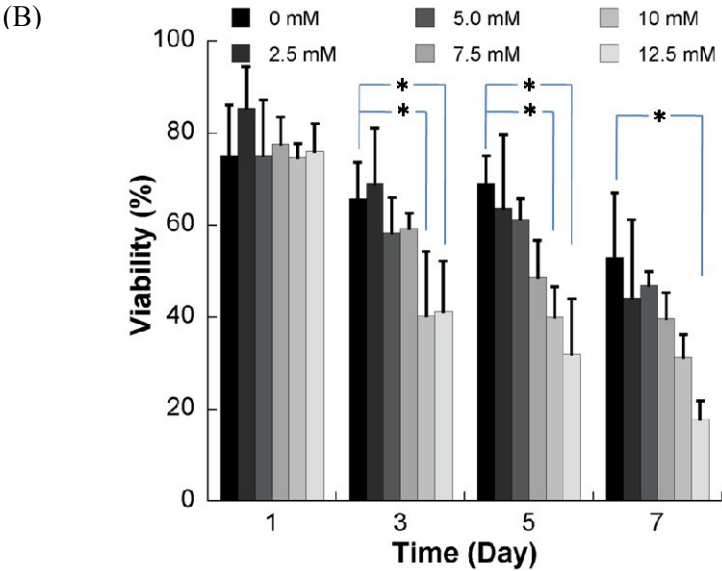

S3.

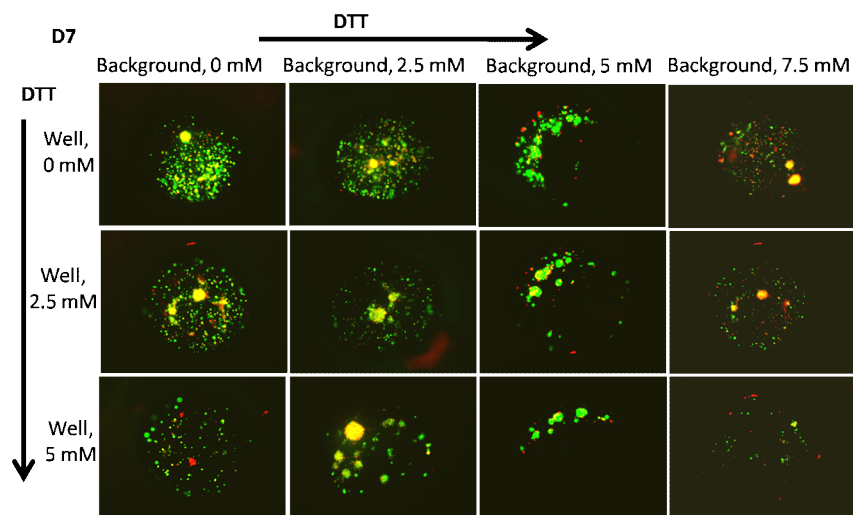

S4.

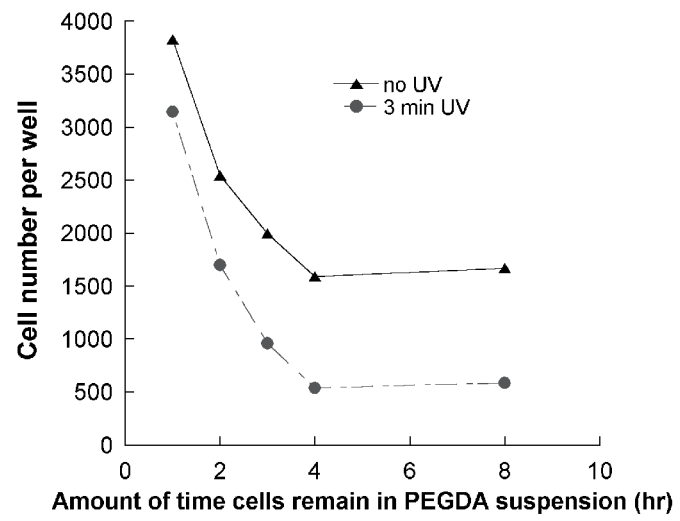

Supplement: NIHMS55707-supplement-01.pdf [file NIHMS55707-supplement-01.pdf]
